# Supplementary material for: Nanofibrillation is an Effective Method to Produce Chitin Derivatives for Induction of Plant Responses in Soybean
Source: MDPI journal article supplement (doi:10.3390/plants9070810), 2020-06-28
Supplement: s1 [file s1]

**a**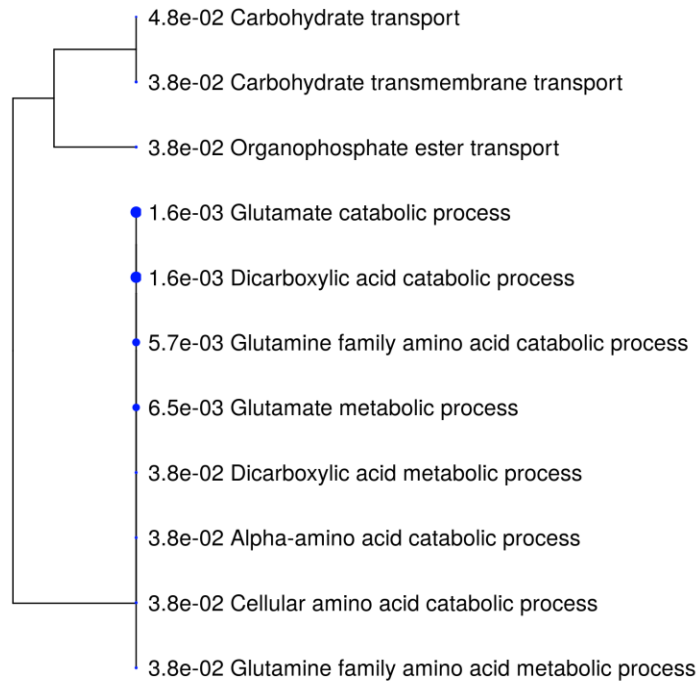**b**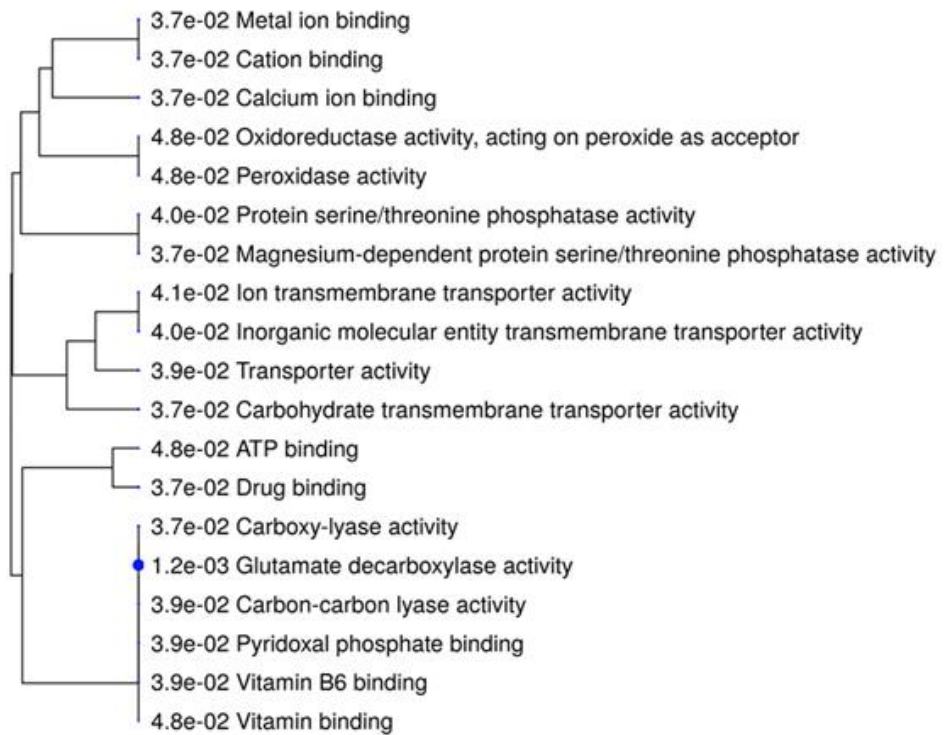

Supplemental Figure S1. Hierarchical trees summarizing significant gene ontology (GO) terms. The trees of GO categories, Biological Process (a) and Molecular Function (b), were generated by ShinyGO web site. GO Terms sharing more genes are grouped, and bigger dots at the end of branches correspond to more significant FDR values.

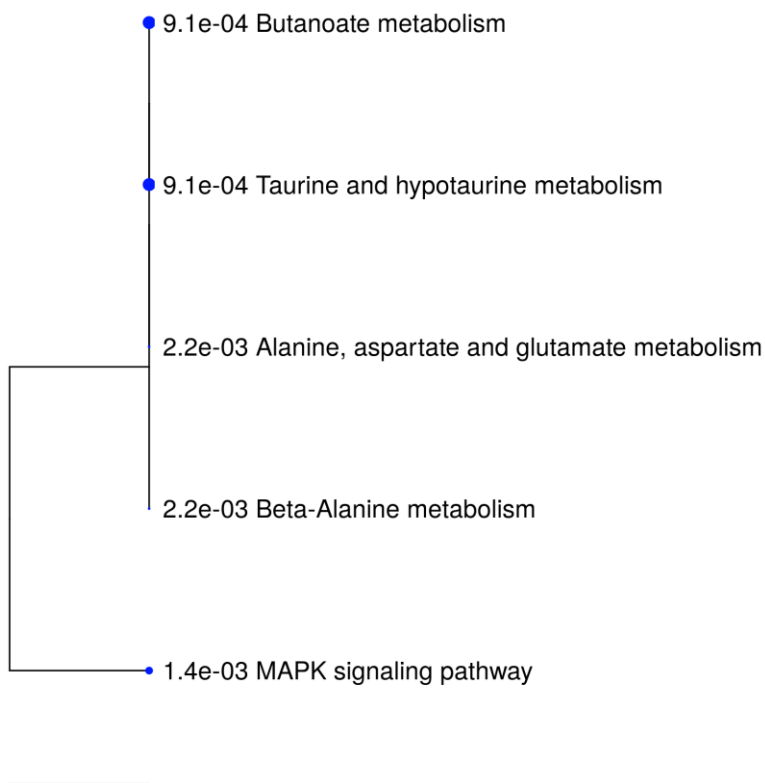

Supplemental Figure S2 Hierarchical tree summarizing significant Kyoto Encyclopedia of Genes and Genomes (KEGG) pathways. The details of tree are found in Fig. S1.

Table S1 Summary of transcriptome analysis

| Sample name                      | Control-1 | Control-2 | Control-3 | CO-1    | CO-2    | CO-3    | CNF-1   | CNF-2   | CNF-3   |
|----------------------------------|-----------|-----------|-----------|---------|---------|---------|---------|---------|---------|
| Number of raw reads              | 5197979   | 6750046   | 9538029   | 8516607 | 7100973 | 5829062 | 7427079 | 7399271 | 6922205 |
| Average read length (bp)         | 126       | 126       | 126       | 126     | 126     | 126     | 126     | 126     | 126     |
| Uniquely mapped reads            | 92.54%    | 76.17%    | 93.00%    | 93.02%  | 92.77%  | 92.28%  | 92.34%  | 91.96%  | 91.14%  |
| Average mapped length (bp)       | 125.04    | 123.45    | 124.89    | 125.07  | 124.95  | 125.01  | 124.9   | 124.99  | 125.04  |
| Successfully assigned alignments | 89.10%    | 85.10%    | 89.60%    | 89.20%  | 89.20%  | 89.60%  | 89.50%  | 89.70%  | 89.40%  |
